# Supplementary material
Source: HighWire-hosted journal article supplement (https://ejhp.bmj.com/highwire/filestream/152182/field_highwire_adjunct_files/0/ejhpharm-2021-003095supp001_data_supplement.pdf)
Supplement: ejhpharm-2021-003095supp001_data_supplement.pdf [file ejhpharm-2021-003095supp001_data_supplement.pdf]

Hôpital Erasme 

## Best Possible Medication History

**General information**

**Affix the patient label + patient information**

Date : ..... Care unit : .....

Data collected by : .....

Role :  Pharmacist

Pharmacy-technician

Others : .....

**Lifestyle :**

|           |                          |                          |                          |                                         |
|-----------|--------------------------|--------------------------|--------------------------|-----------------------------------------|
|           | Never                    | Stop                     | Yes                      | <i>Frequency, duration, type, etc.:</i> |
| Alcohol   | <input type="checkbox"/> | <input type="checkbox"/> | <input type="checkbox"/> | .....                                   |
| Drugs use | <input type="checkbox"/> | <input type="checkbox"/> | <input type="checkbox"/> | .....                                   |
| Tobacco   | <input type="checkbox"/> | <input type="checkbox"/> | <input type="checkbox"/> | .....                                   |

**Source(s) used during the realization of the BPMH:**

|                                                                                                                      |                                                                                  |
|----------------------------------------------------------------------------------------------------------------------|----------------------------------------------------------------------------------|
| N° 1 <input type="checkbox"/> Medical record : .....                                                                 | N° 9 <input type="checkbox"/> Patients' personal treatment                       |
| N° 2 <input type="checkbox"/> Interview : <input type="checkbox"/> patient <input type="checkbox"/> relative : ..... | N° 10 <input type="checkbox"/> Pharmacist's medication plan                      |
| N° 3 <input type="checkbox"/> Institution's treatment sheet : .....                                                  | N° 11 <input type="checkbox"/> E-health ( <i>computerized health documents</i> ) |
| N° 4 <input type="checkbox"/> Call institution : .....                                                               | Tél : .....                                                                      |
| N° 5 <input type="checkbox"/> Call family physician : .....                                                          | Tél : .....                                                                      |
| N° 6 <input type="checkbox"/> Call pharmacist : .....                                                                | Tél : .....                                                                      |
| N° 7 <input type="checkbox"/> Call : .....                                                                           | Tél : .....                                                                      |
| N° 8 <input type="checkbox"/> Other(s) source(s) of information: .....                                               |                                                                                  |

### Medication<sup>1</sup>

| Sources |       |       |       |       | Medication                         |         |      |           |         | Dosage     |                                                                                                          |                |           |                 | Medication |  |  |
|---------|-------|-------|-------|-------|------------------------------------|---------|------|-----------|---------|------------|----------------------------------------------------------------------------------------------------------|----------------|-----------|-----------------|------------|--|--|
| N° ..   | N° .. | N° .. | N° .. | N° .. | Medication<br>(name, dosing, form) | Morning | Noon | Afternoon | Evening | At bedtime | Remarks<br>( <i>indication, diagram, taken in relation to meals, prescribers, specific dosage, ...</i> ) | Chronic, acute | On demand | Self-medication |            |  |  |
|         |       |       |       |       |                                    |         |      |           |         |            |                                                                                                          |                |           |                 |            |  |  |
|         |       |       |       |       |                                    |         |      |           |         |            |                                                                                                          |                |           |                 |            |  |  |
|         |       |       |       |       |                                    |         |      |           |         |            |                                                                                                          |                |           |                 |            |  |  |
|         |       |       |       |       |                                    |         |      |           |         |            |                                                                                                          |                |           |                 |            |  |  |
|         |       |       |       |       |                                    |         |      |           |         |            |                                                                                                          |                |           |                 |            |  |  |
|         |       |       |       |       |                                    |         |      |           |         |            |                                                                                                          |                |           |                 |            |  |  |
|         |       |       |       |       |                                    |         |      |           |         |            |                                                                                                          |                |           |                 |            |  |  |
|         |       |       |       |       |                                    |         |      |           |         |            |                                                                                                          |                |           |                 |            |  |  |
|         |       |       |       |       |                                    |         |      |           |         |            |                                                                                                          |                |           |                 |            |  |  |
|         |       |       |       |       |                                    |         |      |           |         |            |                                                                                                          |                |           |                 |            |  |  |
|         |       |       |       |       |                                    |         |      |           |         |            |                                                                                                          |                |           |                 |            |  |  |
|         |       |       |       |       |                                    |         |      |           |         |            |                                                                                                          |                |           |                 |            |  |  |

<sup>1</sup> If you check the box, please complete the table "medication therapy"  
Development and Delphi validation of a Best Possible Medication History form, C. Hoornaert, S. Pochet, S. Lorent .

Corresponding author: Camille Hoornaert, Clinical Pharmacist  
Hôpital Erasme, Pharmacy Department  
808, route de Lennik, 1070 Brussels, Belgium  
[camille.hoornaert@erasme.ulb.ac.be](mailto:camille.hoornaert@erasme.ulb.ac.be)




## Best Possible Medication History



### Home medication management

Medication management :  Patient : .....  Institution : .....

Relative : .....  Other : .....

Home-care nurse : .....  Inapplicable : .....

Assistance in medication management  Written list  Pill dispenser (*type, prepared by*):.....

Inapplicable  Pharmacist's medication plan

Other : .....

Did you bring your personal treatment to the hospital? :  No  Yes

Storage area :  Patient's room  Treatment room  According to institutional regulations  Other : .....

### Questions about medication

Are you taking medication in the form of <sup>1</sup>:  cream/gel,  drops (nose, eyes, ear),  injection,  patch,  aerosol  syrup,  spray,  suppository/ovule,  sample

Are you taking medication for <sup>2</sup>: Cardiovascular system ( cholesterol,  heart/bloodstream), digestive ( constipation/ diarrhea,  digestion/stomach,  acidity), endocrine ( contraception/hormones,  diabetes,  thyroid), musculoskeletal ( joints,  bones), nervous ( sleep/relax,  pain), respiratory , urinary

Are you taking <sup>3</sup>:  medication over the counter (*self-medication*),  drugs advised/given/purchased on internet,  dietary supplement,  homeopathy,  essential oil,  officinal/magistral preparations,  vitamins,  medicinal plants

Are you taking any medication <sup>1</sup>:  1x/week,  1x/month,  1x/3months,  1x/year

|                                                                              | Yes                      | No                       | Describe : |
|------------------------------------------------------------------------------|--------------------------|--------------------------|------------|
| During the last 2 years, have you been vaccinated?                           | <input type="checkbox"/> | <input type="checkbox"/> | .....      |
| In the last 2 months, were there any changes in your treatment?              | <input type="checkbox"/> | <input type="checkbox"/> | .....      |
| In the last 2 months, have you taken any antibiotics/antivirals/antifungals? | <input type="checkbox"/> | <input type="checkbox"/> | .....      |
| Are you having difficulties swallowing the medication?                       | <input type="checkbox"/> | <input type="checkbox"/> | .....      |
| Do you know terms of use your medication?                                    | <input type="checkbox"/> | <input type="checkbox"/> | .....      |

*If the patient does not know the terms of use or the demonstration is incorrect, schedule an appointment for therapeutic patient education.*

### Allergies/side effects

|                                                        | Yes                      | No                       | Describe ( <i>drugs/products concerned, date and type of reaction</i> ) : |
|--------------------------------------------------------|--------------------------|--------------------------|---------------------------------------------------------------------------|
| Have you ever had any allergies and/or intolerances?   | <input type="checkbox"/> | <input type="checkbox"/> | .....                                                                     |
| Have you ever experienced any unpleasant/side effects? | <input type="checkbox"/> | <input type="checkbox"/> | .....                                                                     |

### Medication adherence

<sup>1</sup> If you check the box, please complete the table "medication therapy"

Development and Delphi validation of a Best Possible Medication History form, C. Hoornaert, S. Pochet, S. Lorent .

Corresponding author: Camille Hoornaert, Clinical Pharmacist  
Hôpital Erasme, Pharmacy Department  
808, route de Lennik, 1070 Brussels, Belgium  
[camille.hoornaert@erasme.ulb.ac.be](mailto:camille.hoornaert@erasme.ulb.ac.be)
